# Supplementary material
Source: Research Square preprint supplement (doi:10.21203/rs.3.rs-9128539/v1)
Supplement: Supplementary file 1 [file 18f0d4639bb876aa1dfdf9c4.docx]

# Table S2 Studies appeared to meet the criteria but excluded (Not all the excluded studies were listed).

| Index | Author | doi | PMID | Reason for exclusion |
| --- | --- | --- | --- | --- |
| 1 | Cheng et al. | 10.3389/fimmu.2023.1191130 | 3760083 | Not patients with acute pancreatitis |
| 2 | Frøkjær et al. | 10.1016/j.cgh.2011.11.024 | 22155560. | Patients are with chronic pancreatitis but not acute pancreatitis |
| 3 | Gong et al. | 10.1159/000525230 | 35785763 | Not an observational study, but an RCT |
| 4 | Qin et al. | 10.1186/s12944-025-02448-2 | 39871253 | No available data |
| 5 | Liu et al. | 10.62347/WUCX7491 | 41415040 | No available data |

# 1 Cheng W, Bu X, Xu C, Wen G, Kong F, Pan H, Yang S, Chen S. Higher systemic immune-inflammation index and systemic inflammation response index levels are associated with stroke prevalence in the asthmatic population: a cross-sectional analysis of the NHANES 1999-2018. Front Immunol. 2023 Aug 4;14:1191130. doi: 10.3389/fimmu.2023.1191130. PMID: 37600830; PMCID: PMC10436559.

# 2 Frøkjær JB, Bouwense SA, Olesen SS, Lundager FH, Eskildsen SF, van Goor H, Wilder-Smith OH, Drewes AM. Reduced cortical thickness of brain areas involved in pain processing in patients with chronic pancreatitis. Clin Gastroenterol Hepatol. 2012 Apr;10(4):434-8.e1. doi: 10.1016/j.cgh.2011.11.024. Epub 2011 Dec 7. PMID: 22155560.

# 3 Gong M, Pan H, Yang X, Pan C, Ning Y, Li J. Prolonged Intermittent Renal Replacement Therapy Combined with Hemoperfusion Can Improve Early Recovery of Moderate and Severe Acute Pancreatitis, Especially in Patients with Acute Kidney Injury. Blood Purif. 2023;52(1):75-85. doi: 10.1159/000525230. Epub 2022 Jul 4. PMID: 35785763.

# 4 Qin R, Liu Y, Ding R, et al. Efficacy of double filtration plasmapheresis in hyperlipidemia acute pancreatitis: a retrospective observational study. Lipids Health Dis. 2025 Jan 27;24(1):27. doi: 10.1186/s12944-025-02448-2. PMID: 39871253; PMCID: PMC11773909

# 5 Liu T, Ye S, Wang K, et al. Diagnostic value of inflammatory indices and triglycerides in hyperlipidemic acute pancreatitis. Am J Transl Res. 2025 Nov 15;17(11):8481-8495. doi: 10.62347/WUCX7491. PMID: 41415040; PMCID: PMC12709323
