# Supplementary material
Source: Research Square preprint supplement (doi:10.21203/rs.3.rs-9128539/v1)
Supplement: Supplementary file 2 [file c8388fcc5367bac64898426f.docx]

**Table S1 Search query in Pubmed:**

#1 " Pancreatitis "[Mesh]

#2 " Pancreatitis, Acute "[tiab] OR " Acute Pancreatitis "[tiab] OR " Acut Pancreatitides "[tiab] OR " Acute Edematous Pancreatitides "[tiab] OR " Edematous Pancreatitis, Acute "[tiab] OR "Acute Edematous Pancreatitis "[tiab] OR “Peripancreatic Fat Necrosis” [tiab]

#3 #1 OR #2

#4 " SII "[tiab] OR " Systemic immune-inflammation index "[tiab]

#5 #3 AND #4
